# Supplementary material for: Influence of Grain Size on Mechanical Properties of a Refractory High Entropy Alloy under Uniaxial Tension
Source: MDPI journal article supplement (doi:10.3390/cryst13020357), 2023-02-19
Supplement: s1 [file s1]

Archive with 1 entries (1 files):
- crystals-2219930-supplementary.pdf
